# Supplementary material for: Three-dimensional distribution of nutrients and phytoplankton biomass in a semi-enclosed region of the Gulf of California during different ENSO phases
Source: publisher site journal article supplement (doi:10.1515/bot-2025-0007), 2025-06-23
Supplement: Supplementary file 2 [file j_bot-2025-0007_suppl_001.docx]

**Supplementary Material**

**Three-dimensional distribution of nutrients and phytoplankton biomass in a semi-enclosed region of the Gulf of California during different ENSO phases**

Carlos Mauricio Torres-Martínez et al.

DOI 10.1515/bot-2025-0007

**Supplementary Table S1:** *p*-Values calculated for nutrients and Chl-*a* concentrations between both research cruises for each sampling depth.

|  | ***p*-Value for each sampling depth** | | | |
| --- | --- | --- | --- | --- |
| **Nutrient** | **Surface** | **10 m** | **30 m** | **50 m** |
| NO3 | **0.000015** | **0.000001** | **0.000917** | 0.274868 |
| NO2 | **0.000322** | **0.000789** | **0.000876** | 0.338167 |
| SRP | **0.000504** | **0.002053** | **0.000306** | 0.338167 |
| SRSi | **0.000000** | **0.000184** | **0.000040** | **0.000000** |
| Chl-*a* | 0.223774 | 0.331026 | 0.157517 | 0.200947 |
